# Supplementary material for: A Promising Food-Coaching Intervention Program to Achieve Optimal Gestational Weight Gain in Overweight and Obese Pregnant Women: Pilot Randomized Controlled Trial of a Smartphone App
Source: PubMed Central journal article supplement (PMC6914273; doi:10.2196/13013), 2019-10-24
Supplement: formative_v3i4e13013_app2.pdf [file formative_v3i4e13013_app2.pdf]

## Self-evaluation on Acceptability on GlycoLeap Application during Pregnancy

1. How often did you log into glycoLeap?
  - a) Less than once a week;
  - b) About once a week;
  - c) About 2-3 times a week;
  - d) About 4-5 times a week;
  - e) Every day.
2. How often did you upload photos into glycoLeap?
  - a) Everyday;
  - b) Once a wekk;
  - c) About 2-3 times a week;
  - d) About 4-5 times a week;
  - e) Irregular.
3. How easy was it to upload a food picture to glycoLeap?
  - a) Very difficult
  - b) Somehow difficult
  - c) Somehow easy
  - d) Very easy
4. Have you used some application like glycoLeap to monitor your diet before?
  - a) No
  - b) Yes

If Yes, what was/were those application(s) that you have used before? Which one do you think is better?

---
5. How easy was it to interpret the food coach's comments or feedback?
  - a) Very difficult
  - b) Somehow difficult
  - c) Somehow easy
  - d) Very easy
6. Do you think it is acceptably fast to receive a food coach's comments or feedback during the daytime 8am-8pm?
  - a) Yes
  - b) No

If No, why?
7. Have you made any changes to your diet after using glycoLeap?
  - a) No
  - b) Yes

If Yes, in what way that you tried to change?

---

8. Have you ever viewed your steps counts in the GlycoLeap mobile app?
  - a) Never
  - b) Yes, but not often
  - c) Yes, very often
9. Are you satisfied with the food imaging coaching on GlycoLeap?
  - a) Not satisfied
  - b) Slightly satisfied.
  - c) Quite satisfied.
  - d) Very satisfied.
10. Do you think it is useful to supervise your own diet through glycoleap?
  - a) No
  - b) Yes, but not much
  - c) Yes, significantly
11. Do you find it easier to manage your food choices during pregnancy after using GlycoLeap?
  - a) No
  - b) Yes, but not much
  - c) Yes, significantly
12. Have you ever talked to your family or friends about glycoleap?
  - a) No
  - b) Yes
13. How will you recommend GlycoLeap to your friends or family?
  - a) Will not recommend
  - b) Probably will recommend
  - c) Quite likely to recommend
  - d) Will highly recommend
14. Will you be willing to pay for such service like GlycoLeap in the future?
  - a) No
  - b) Yes
15. Do you think you have enough support from your husband via using GlycoLeap?
  - a) No
  - b) Yes

If No, why?
16. Do you think there has been a significant help in changing your diet with your husband's involvement via using GlycoLeap?
  - a) No
  - b) Yes

If No, why?

---
