# Supplementary material for: A Promising Food-Coaching Intervention Program to Achieve Optimal Gestational Weight Gain in Overweight and Obese Pregnant Women: Pilot Randomized Controlled Trial of a Smartphone App
Source: PubMed Central journal article supplement (PMC6914273; doi:10.2196/13013), 2019-10-24
Supplement: formative_v3i4e13013_app3.pdf [file formative_v3i4e13013_app3.pdf]

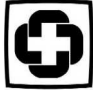

Patient's name label

## Food Diary Form

(Date: \_\_\_\_\_)

- ❖ **Please record all the foods, drinks and snacks that you usually consume.**
- ❖ **Use ONE form for each day and record your intake on 2 weekdays and 1 weekend.**
- ❖ **Include the quantity as accurately as possible, using the food pictures provided in the booklet to estimate your food portion sizes.**

| MEAL                         | FOOD (Description, cooking method, quantity)<br><br>For example: Plain rice, A1; Chicken, without skin, stir-fried with soy sauce, C2; broccoli, boiled, J2; 1 small red apple, with skin | DRINKS (Description, quantity)<br><br>For example: Coffee with or without milk or sugar; type of milk (non-fat, low fat); instant, ground, decaffeinated; 250ml. |
|------------------------------|-------------------------------------------------------------------------------------------------------------------------------------------------------------------------------------------|------------------------------------------------------------------------------------------------------------------------------------------------------------------|
| Breakfast<br>( _____ )       |                                                                                                                                                                                           |                                                                                                                                                                  |
| Mid – morning<br>( _____ )   |                                                                                                                                                                                           |                                                                                                                                                                  |
| Lunch<br>( _____ )           |                                                                                                                                                                                           |                                                                                                                                                                  |
| Mid – afternoon<br>( _____ ) |                                                                                                                                                                                           |                                                                                                                                                                  |
| Dinner<br>( _____ )          |                                                                                                                                                                                           |                                                                                                                                                                  |

|                                                                                                         |  |  |
|---------------------------------------------------------------------------------------------------------|--|--|
| <b>Supper<br/>( _____ )</b>                                                                             |  |  |
| <b>Others<br/>(include<br/>any other<br/>snacks or<br/>drinks<br/>consume<br/>d during<br/>the day)</b> |  |  |
